# Supplementary material for: Mechanisms of glacial‐to‐future atmospheric CO 2 effects on plant immunity
Source: PubMed Central journal article supplement (PMC5873421; doi:10.1111/nph.15018), 2018-02-09
Supplement: NPH-218-752-s001.pdf [file NPH-218-752-s001.pdf]

**New Phytologist Supporting Information Figs S1-S9, Tables S1-S2 and Methods S1**

**Article title:** Mechanisms of glacial-to-future atmospheric CO<sub>2</sub> effects on plant immunity

**Authors:** Alex Williams, Pierre Pétriacq, Roland E. Schwarzenbacher, David J. Beerling & Jurriaan Ton

**Article acceptance date:** 26 December 2017

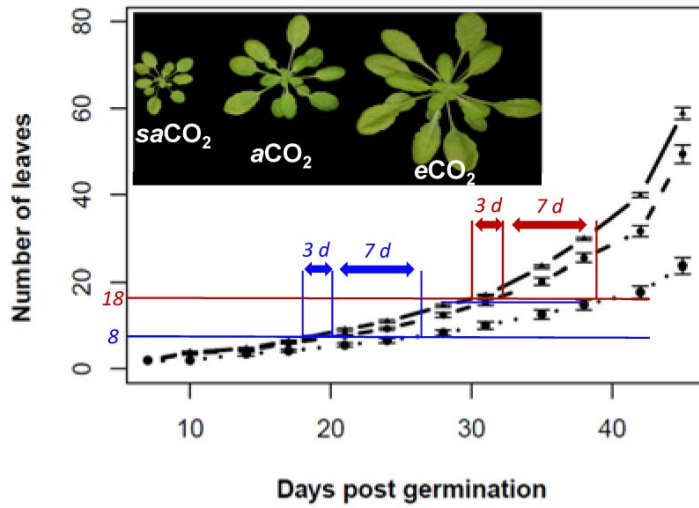

**Fig. S1** Effects of CO<sub>2</sub> on plant development. Data represent average leaf numbers ( $\pm$  SE;  $n = 8$ ) plotted against time (days) at ambient CO<sub>2</sub> (*aCO<sub>2</sub>*; 400 ppm; dashed line), subambient CO<sub>2</sub> (*saCO<sub>2</sub>*; 200 ppm; dotted line) and elevated CO<sub>2</sub> (*eCO<sub>2</sub>*; 1200 ppm; straight line). Inserts show typical rosette sizes of 4.5-week old plants. Red and blue lines illustrate differences in absolute age at the 8- and 18-leaf stage, respectively. Shown are results from a representative experiment that was repeated twice.

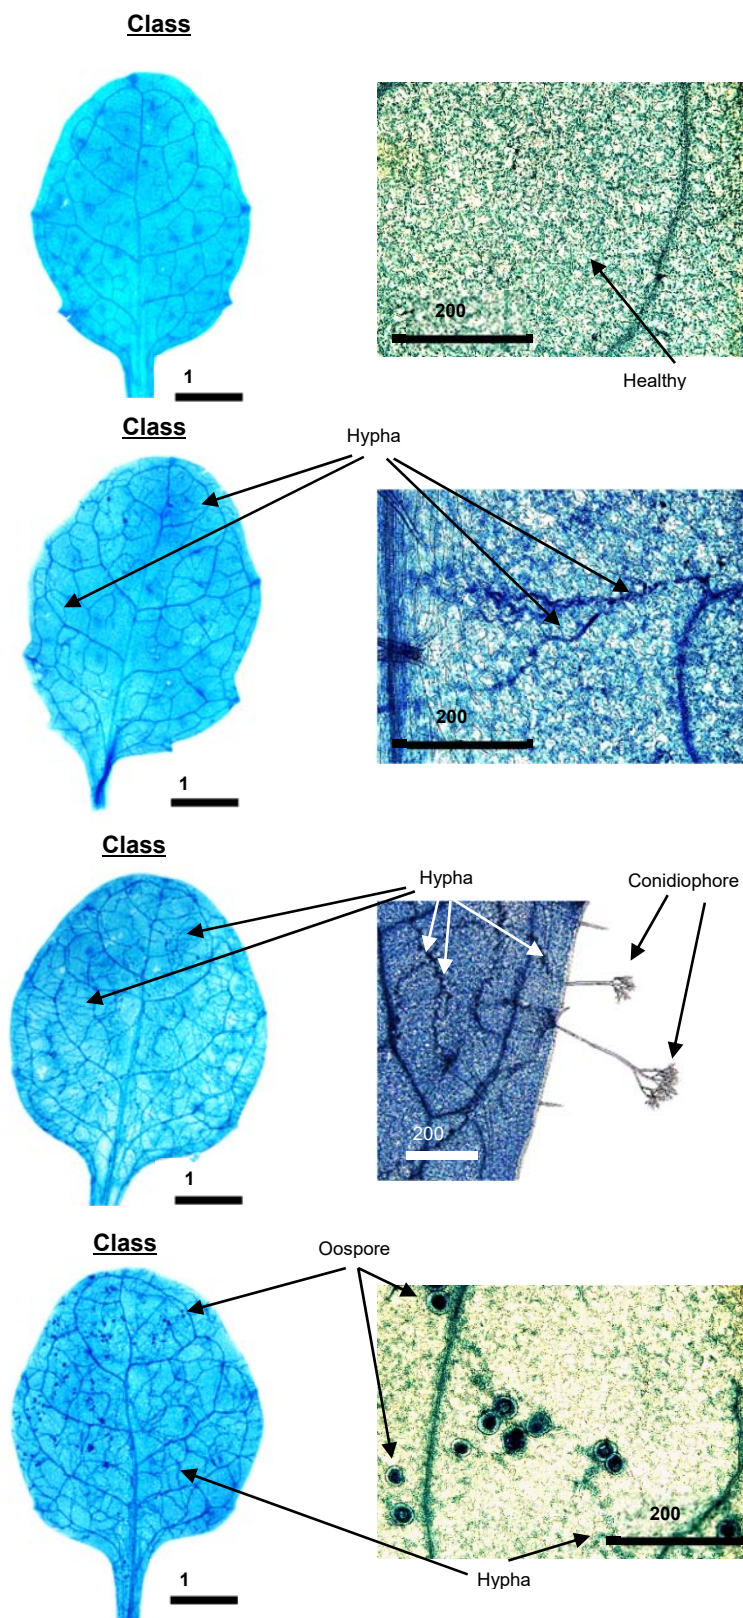

**Fig. S2** Representative examples of the four different *Hpa* colonization classes that were used to quantify Arabidopsis resistance. To visualise *Hpa* colonisation, leaves were stained with lactophenol trypan-blue, as described previously (Luna et al. 2012). Class I is defined by a lack of hyphal growth; Class II sustains hyphal development, but not the production of asexual conidiospores; Class III is characterised by extensive hyphal colonisation and the formation of conidiophores and asexual conidiospores; Class IV is similar as class III, but with additional formation of sexual oospores (> 10 per leaf). Black bars indicate scales.

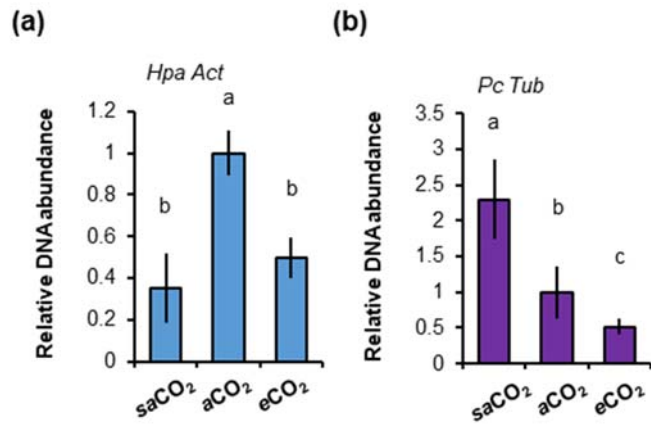

**Fig. S3** qPCR-based quantification of pathogen biomass to confirm the development-independent effects of CO<sub>2</sub> on resistance against *Hpa* and *Pc*. (a) Relative quantification of *Hpa* DNA was based on the *Hpa* actin gene (ID: 807716). (b) Relative quantification of *Pc* DNA was based on the *Pc*  $\beta$ -tubulin gene. Data represent relative DNA quantities normalized to *Arabidopsis ACT2* (At3g18780) ( $\pm$  SD, n = 4). Letters indicate statistical differences (ANOVA + Tukey post-hoc analysis;  $P < 0.05$ ). For details about DC and timing of pathogen inoculation, see legend to Fig. 1.

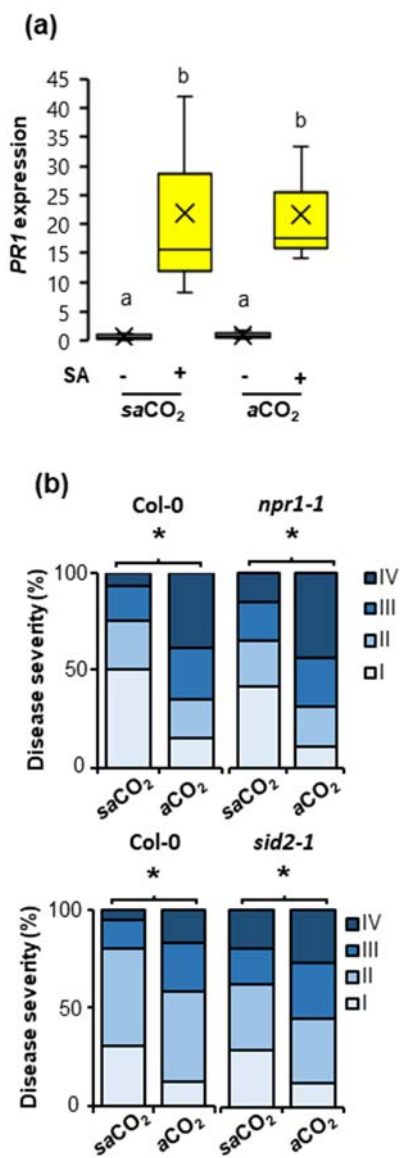

**Fig. S4** SA signalling in *saCO<sub>2</sub>*-induced resistance against *Hpa*. (a) Levels of SA-inducible *PR1* gene expression in 8-leaf Col-0 at *saCO<sub>2</sub>* (200 ppm) and *aCO<sub>2</sub>* (400 ppm). Shown are box plots of relative transcript values ( $n = 3$ ; means are indicated by X) at 24 hours after treatment. (b) Quantification of *Hpa* resistance at *saCO<sub>2</sub>* and *aCO<sub>2</sub>* in Col-0, the SA insensitive *npr1-1* mutant, and the SA production mutant *sid2-1* at the 8-leaf stage. Shown are relative numbers of leaves ( $n > 50$ ) in *Hpa* colonization classes of increasing severity (I–IV) at 7 dpi. Letters - (a) ANOVA with Tukey HSD post hoc analysis - or asterisks - (b) Fisher's exact test - indicate statistically significant differences between conditions ( $P < 0.05$ ). The pathogenicity assays with *sid2-1* and *npr1-1* were repeated with similar results.

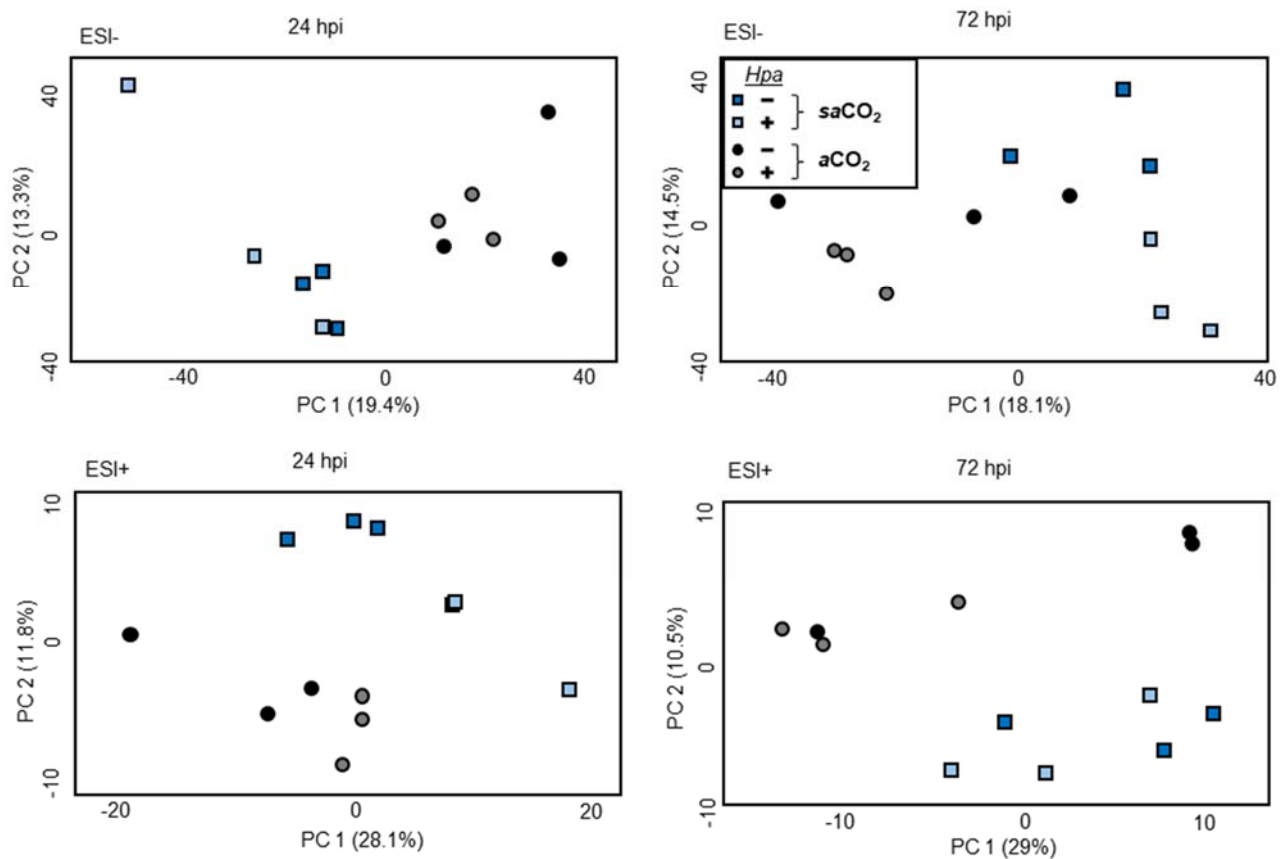

**Fig. S5** Global metabolic signatures of mock- and *Hpa*-inoculated *Arabidopsis* (Col-0) at the 8-leaf growth stage at *saCO*<sub>2</sub> (200 ppm) and *aCO*<sub>2</sub> (400 ppm). Shown are principal component analysis (PCA) plots of negative (ESI<sup>-</sup>; 4497 ions) and positive (ESI<sup>+</sup>; 5683 ions) ionizations, obtained by UPLC-Q-TOF analysis of methanol extracts from leaf tissue at 24 and 72 hpi. Samples from plants grown at *saCO*<sub>2</sub> are indicated by circles; samples from plants at *aCO*<sub>2</sub> are indicated by squares. Black/blue symbols indicate mock-inoculated plants; grey/ light blue symbols indicate samples from *Hpa*-inoculated plants.

(a)

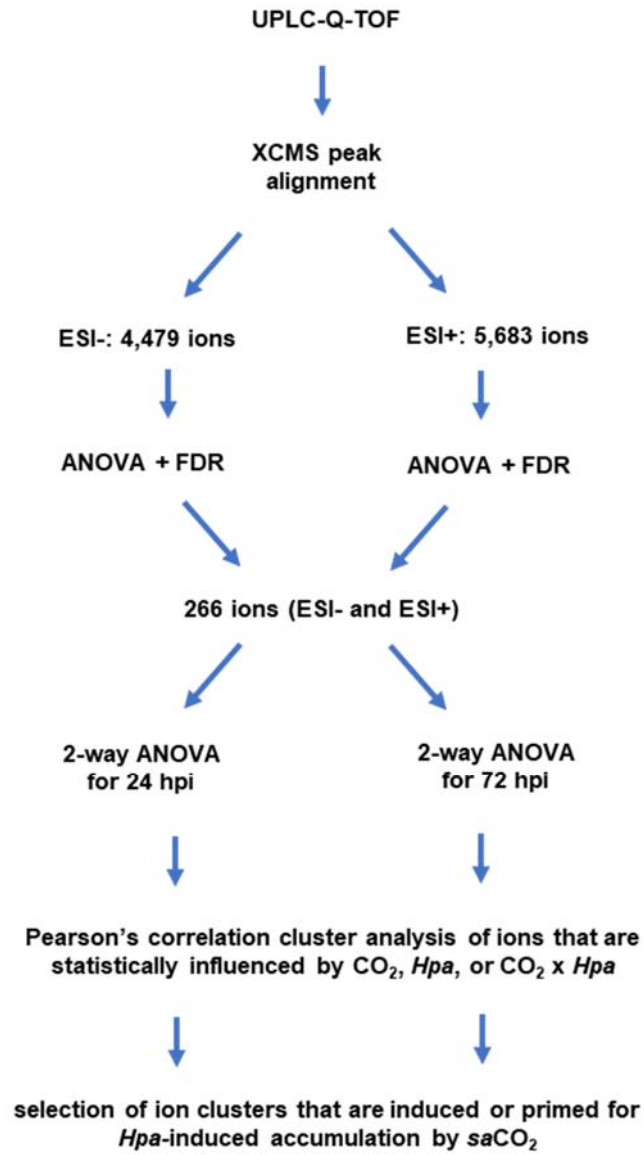

(b)

| Factor                | 24 hpi | 72 hpi |
|-----------------------|--------|--------|
| CO <sub>2</sub>       | 111    | 57     |
| Hpa                   | 65     | 34     |
| CO <sub>2</sub> x Hpa | 24     | 17     |

(c)

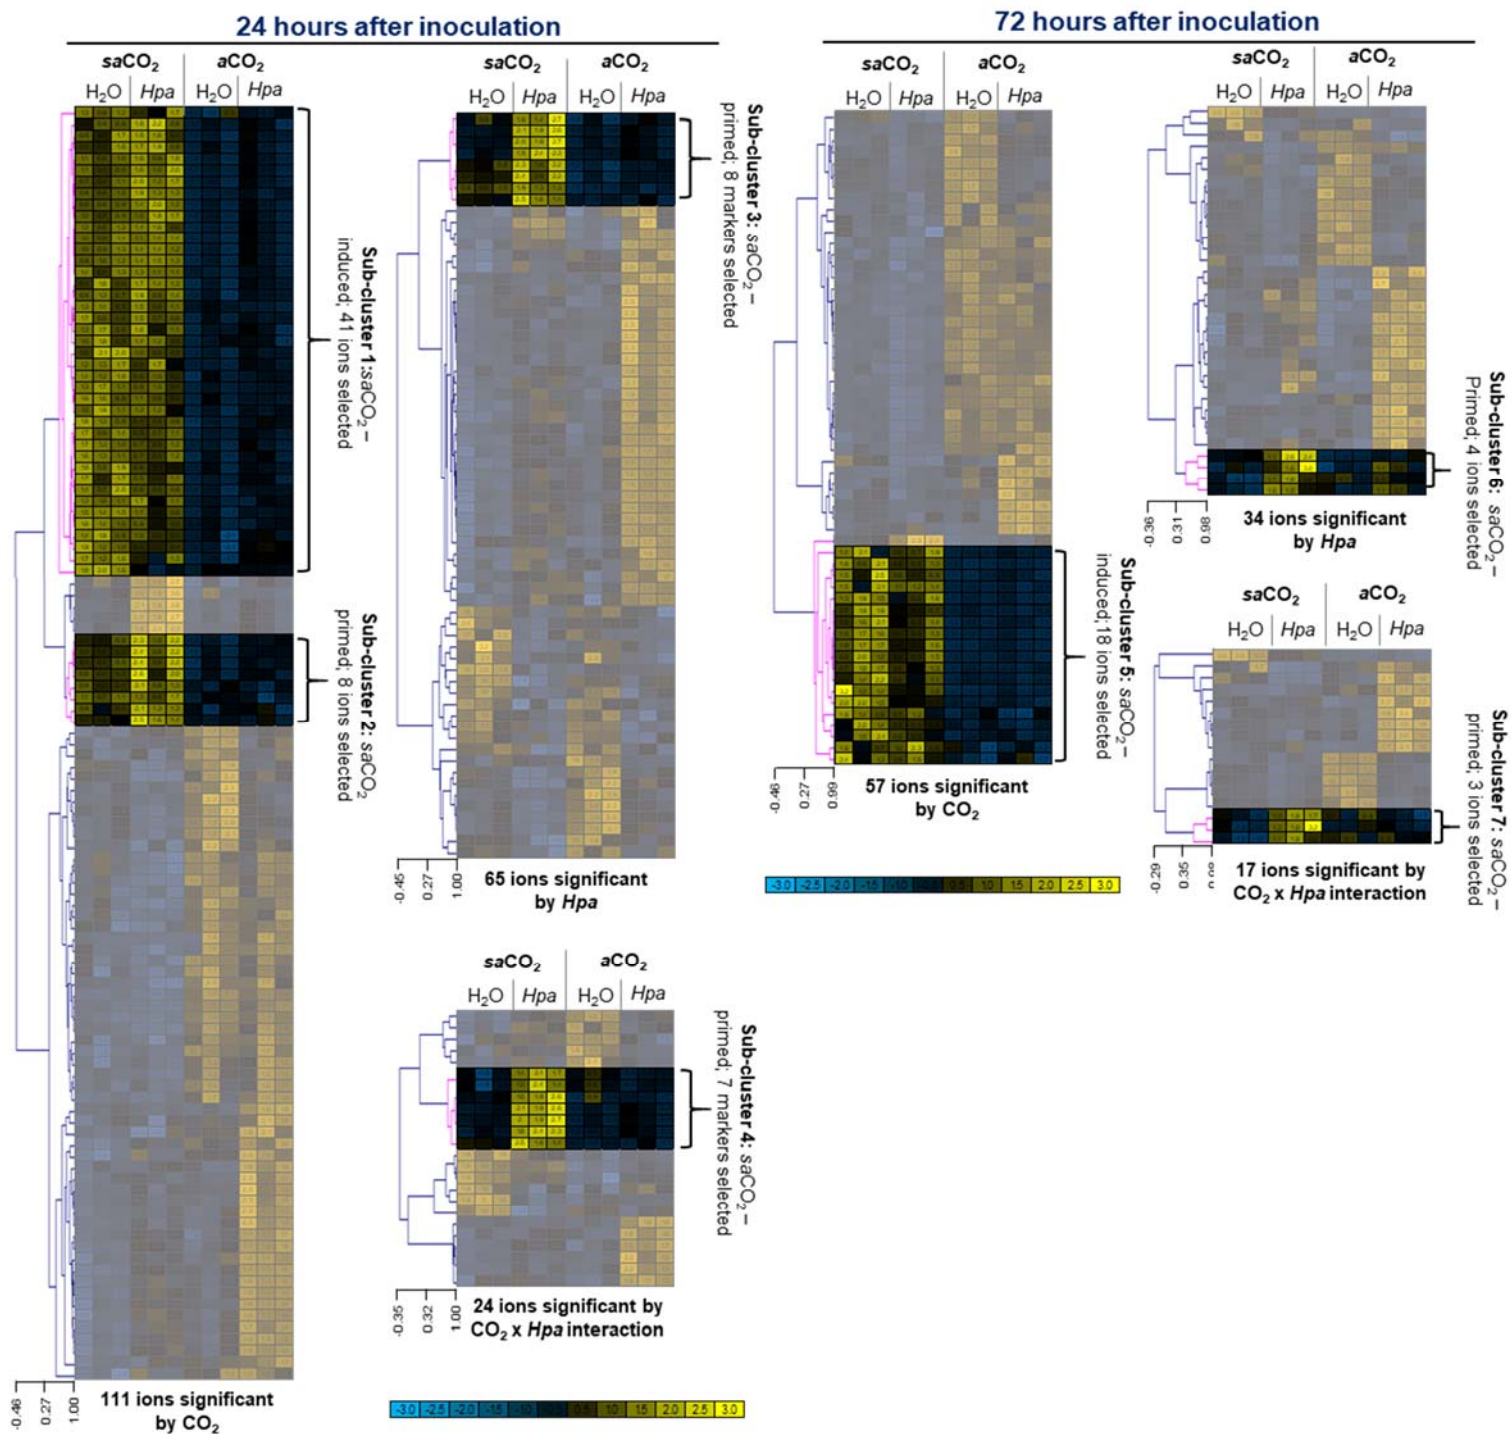

**Fig S6** Selection of ions that are induced or primed for *Hpa*-induced accumulation by *saCO<sub>2</sub>*. (a) Schematic pipeline of the selection procedure. (b) Numbers of statistically significant ions by 2-way ANOVA of the selection of 266 ions. (c) Hierarchical cluster analysis (Pearson's correlation) of ions that are significantly influenced by *CO<sub>2</sub>*, *Hpa* or the interaction *CO<sub>2</sub>* x *Hpa*. Highlighted are ion clusters showing direct induction (*saCO<sub>2</sub>* - induced) or priming for *Hpa*-induced accumulation by *saCO<sub>2</sub>* (*saCO<sub>2</sub>* - primed).



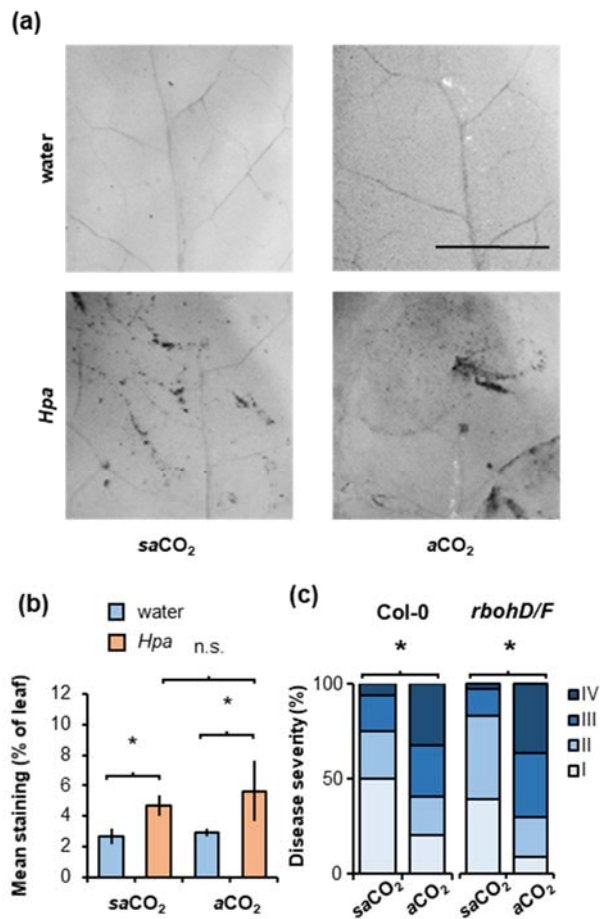

**Fig. S7** Extracellular H<sub>2</sub>O<sub>2</sub> in *sa*CO<sub>2</sub>-induced resistance against *Hpa*. (a) Visualization of extracellular H<sub>2</sub>O<sub>2</sub> accumulation in leaves of Arabidopsis (Col-0) at *a*CO<sub>2</sub> (400 ppm) and *sa*CO<sub>2</sub> (200 ppm). Shown are 3,3'-diaminobenzidine (DAB)-stained leaves at 48 hours after mock (water) or *Hpa* inoculation. Bar = 1 mm. (b) Quantification of DAB staining signal by image analysis. Shown are mean values of the stained proportion of the leaf area (± SD, n = 5). (c) Evaluation of *Hpa* resistance at *a*CO<sub>2</sub> and *sa*CO<sub>2</sub> in Col-0 and *rbohD/F* plants at the 8-leaf stage. The *rbohD/F* double mutant is impaired in production of extracellular H<sub>2</sub>O<sub>2</sub> by NADP-dependent oxidase. Shown are relative numbers of leaves (n > 50) in *Hpa* colonization classes of increasing severity (I–IV) at 7 dpi. Asterisks indicate statistically significant differences between CO<sub>2</sub> conditions (Fisher's exact test; *P* < 0.05).

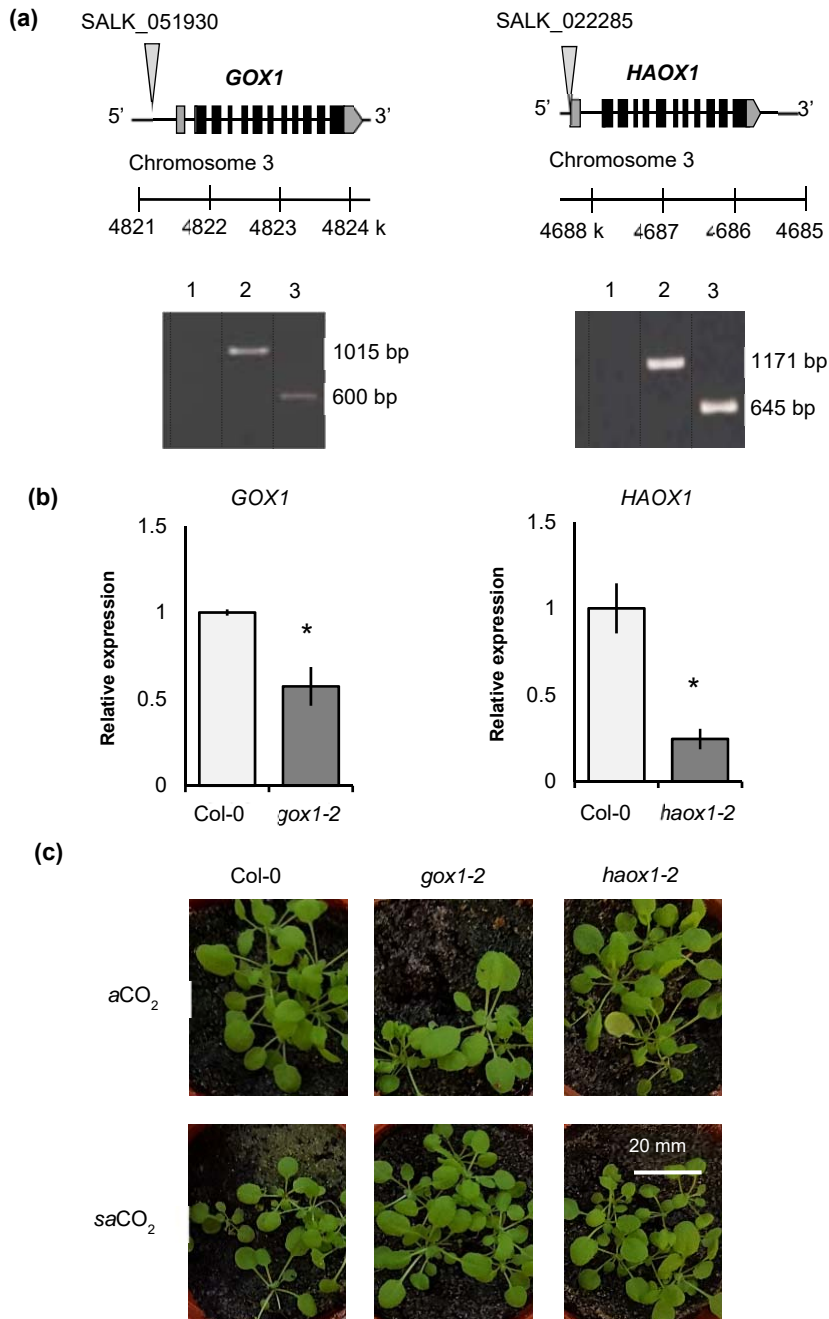

**Fig. S8.** Selection of *gox1-2* (SALK\_051930) and *haox1-2* (SALK\_022285) knock-down mutants. (a) PCR confirmation of homozygous T-DNA insertions. Gene models show locations of T-DNA insertions in promoter regions of *GOX1* and *HAOX1*. Images show PCR products from 1) mutant DNA with LP + RP primers (no band); 2) Col-0 DNA with LP + RP primers, and 3), mutant DNA with LBB1.3 + RP primers. (b) Impacts of knock-down mutations on transcription of *GOX1* and *HAOX1* in *gox1-2* and *haox1-2* plants, respectively. Shown are mean values of relative transcript levels ( $\pm$  SD;  $n = 5$ ) in shoot tissues of 3-week old plants. Asterisks indicate statistically significant reductions in relative transcript level compared to wild-type plants (Col-0; Student's t-test,  $P < 0.05$ ). The experiment was repeated with similar results. (c) Growth phenotypes of 3-week old Col-0, *gox1-2* and *haox1-2* at  $aCO_2$  and  $saCO_2$  conditions.

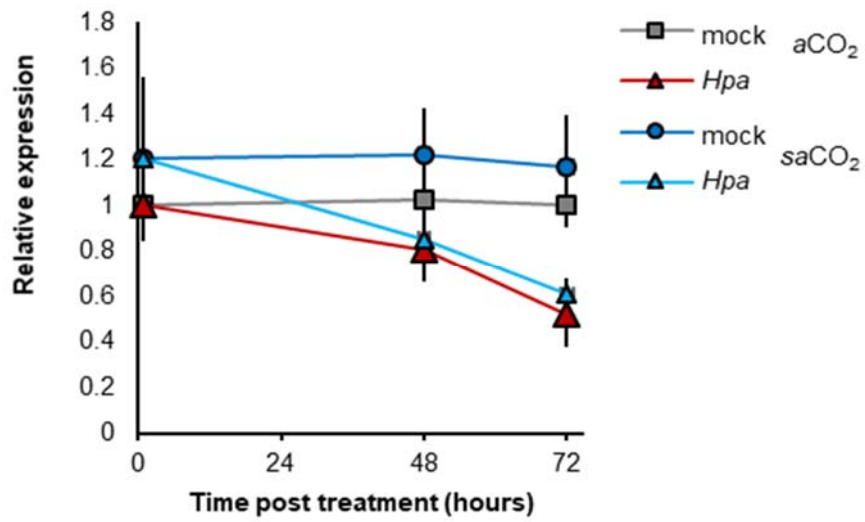

**Fig. S9.** Impacts of *Hpa* inoculation on *CAT2* gene expression in 8-leaf Col-0 plants at *saCO*<sub>2</sub> (200 ppm) and *aCO*<sub>2</sub> (400 ppm). Shown are mean values of relative transcript abundance ( $\pm$  SD, n = 5) at different hours post mock (water) or *Hpa* inoculation.

**Table S1. Primers used for mutant genotyping and RT-qPCR analysis of gene expression**

|                     | Gene                 | Gene locus                | Forward primer sequence (5' - 3')         | Reverse primer sequence (5' - 3')  |
|---------------------|----------------------|---------------------------|-------------------------------------------|------------------------------------|
| <b>Genotyping</b>   | <i>GOX1</i>          | AT3G14420                 | CCG AAA GCT ATT AAA CAG CCC               | CTT ACA TTG CAC CCA ACT TCC        |
|                     | <i>HAOX1</i>         | AT3G14130                 | GCA GAA TGG AGG GGT TTA GTC               | CAT GCA AGA ATC TTG CTC CTC        |
|                     | SALK Insert (LBb1.3) |                           | -                                         | ATT TTG CCG ATT TCG GAA C          |
| <b>qPCR primers</b> | Gene expression      |                           |                                           |                                    |
|                     | <i>GOX1</i>          | AT3G14420                 | AGA ACA GCA GCA ACA CAG AAC               | CAC TAG GCT TGG TTT GTG ATC TGA TA |
|                     | <i>HAOX1</i>         | AT3G14130                 | GAA TTA AAT CTA TGC TCT GAT CCT AAA ACC   | GAA CAA GTC CAA CGT ACT ATT GTC TT |
|                     | <i>CAT2</i>          | AT4G35090                 | CGA GGT ATG ACC AGG TTC GT                | CTT CCA GGC TCC TTG AAG TTG        |
|                     | <i>PR1</i>           | AT2G14610                 | GTC TCC GCC GTG AAC ATG T                 | CGT GTT CGC AGC GTA GTT GT         |
|                     | <i>VSP2</i>          | AT5G24770                 | GGA CTT GCC CTA AAG AAC GAC ACC           | GTC GGT CTT CTC TGT TCC GTA TCC    |
|                     | <i>UBC 9</i>         | AT5G25760                 | TCA CAA TTT CCA AG <sup>^</sup> GTG CTG C | TCA TCT GGG TTT GGA TCC GT         |
|                     | <i>SAND</i>          | AT2G28390                 | AAC TCT ATG CAG CAT T                     | GGT GGT ACT AGC ACA A              |
|                     | DNA quantification   |                           |                                           |                                    |
|                     | HpaACT               | ID807716                  | GTG TCG CAC ACT GTA CCC ATT TAT           | ATC TTC ATC ATG TAG TCG GTC AAG T  |
|                     | Peβ-Tub              |                           | CAA GTA TGT TCC CCG AGC CGT               | GAA GAG CTG ACC GAA GGG ACC        |
| AtACT2              | AT3G18780            | AAT CAC AGC ACT TGC ACC A | GAG GGA AGC AAG AAT GGA AC                |                                    |

**Table S2. Putative identification of metabolic markers detected by UPLC-Q-TOF**

| sample <sup>a</sup> | P value <sup>b</sup> | Detected m/z <sup>c</sup> | RT (min) <sup>c</sup> | Adducts <sup>d</sup>    | Predicted mass <sup>d</sup> | Error (ppm) <sup>d</sup> | Putative compound <sup>d</sup>                                                                                                     | Predicted formula <sup>d</sup>                               | Pathways <sup>e</sup> |            |
|---------------------|----------------------|---------------------------|-----------------------|-------------------------|-----------------------------|--------------------------|------------------------------------------------------------------------------------------------------------------------------------|--------------------------------------------------------------|-----------------------|------------|
| 24 hours            | 1.2E-03              | 351.992                   | 4.4                   | [M+K] <sup>+</sup>      | 313.021                     | 19                       | Eudistomin H                                                                                                                       | C15H12BrN3                                                   | Alkaloids             |            |
|                     | 6.0E-03              | 422.166                   | 1.6                   | [M-H] <sup>-</sup>      | 423.168                     | 13                       | N-Methyl-2,3,7,8-tetramethoxy-5,6-dihydrobenzophenathridine-6-ethanoic acid                                                        | C24H25NO6                                                    | Alkaloids             |            |
|                     | 6.6E-03              | 482.067                   | 1.8                   | [M+Cl] <sup>-</sup>     | 447.108                     | 22                       | Pigment A aglycone                                                                                                                 | C25H19O8                                                     | Anthocyanins          |            |
|                     | 1.0E-03              | 244.027                   | 1.5                   | [M+K-2H] <sup>-</sup>   | 207.081                     | 11                       | Anthocyanidins                                                                                                                     | C15H11O                                                      | Anthocyanins          |            |
|                     | 2.2E-04              | 933.074                   | 1.1                   | [M-H] <sup>-</sup>      | 934.071                     | 10                       | Vescalagin                                                                                                                         | C41H26O26                                                    | Anthocyanins          |            |
|                     | 2.2E-04              | 391.066                   | 1.1                   | [M+Na-2H] <sup>-</sup>  | 370.090                     | 4                        | 5-Hydroxy-6-methoxycoumarin 7-glucoside                                                                                            | C16H18O10                                                    | Coumarin              |            |
|                     | 2.2E-04              | 457.133                   | 2.9                   | [M-H] <sup>-</sup>      | 458.142                     | 5                        | cis-p-Coumaric acid 4-[apiosyl-(1->2)-glucoside]                                                                                   | C20H26O12                                                    | Coumarin              |            |
|                     | 5.3E-03              | 427.124                   | 1.5                   | [M+Na] <sup>+</sup>     | 404.126                     | 20                       | Calomelanol C                                                                                                                      | C24H20O6                                                     | Flavonoids            |            |
|                     | 1.3E-03              | 329.008                   | 4.4                   | [M+2Na-H] <sup>+</sup>  | 284.032                     | 13                       | 7,4',5'-Trihydroxy-5,2'-oxido-4-phenylcoumarin                                                                                     | C15H8O6                                                      | Flavonoids            |            |
|                     | 6.0E-03              | 639.161                   | 3.0                   | [M-H] <sup>-</sup>      | 640.164                     | 6                        | Laricitrin 3-rutinoside                                                                                                            | C28H32O17                                                    | Flavonoids            |            |
|                     | 9.0E-03              | 932.246                   | 2.8                   | [M-H] <sup>-</sup>      | 933.266                     | 14                       | Pelargonidin 3-O-[b-D-Glucopyranosyl-(1->2)-[4-hydroxy-3-methoxy-(E)-cinnamoyl-(->6)]-b-D-glucopyranoside] 5-O-b-D-glucopyranoside | C43H49O23                                                    | Flavonoids            |            |
|                     | 2.5E-03              | 421.163                   | 1.6                   | [M-H] <sup>-</sup>      | 422.173                     | 6                        | Euchrenone b10                                                                                                                     | C25H26O6                                                     | Flavonoids            |            |
|                     | 5.6E-03              | 487.123                   | 2.7                   | [M-H] <sup>-</sup>      | 488.132                     | 3                        | Acacetin 7-(2''-acetylglucoside)                                                                                                   | C24H24O11                                                    | Flavonoids            |            |
|                     | 1.4E-03              | 667.080                   | 3.4                   | [M+2Na-H] <sup>+</sup>  | 622.117                     | 12                       | Apigenin 7-glucuronosyl-(1->2)-glucuronide                                                                                         | C27H26O17                                                    | Flavonoids            |            |
|                     | 3.4E-03              | 603.292                   | 1.6                   | [M-H] <sup>-</sup>      | 604.288                     | 10                       | Cerbertin                                                                                                                          | C32H44O11                                                    | Glucosides            |            |
|                     | 7.8E-04              | 199.097                   | 2.5                   | [M-H] <sup>-</sup>      | 200.105                     | 2                        | Decenedioic acid                                                                                                                   | C10H16O4                                                     | Lipids                |            |
|                     | 8.2E-03              | 453.209                   | 3.0                   | [M+Na-2H] <sup>-</sup>  | 432.236                     | 2                        | Glucosyl (2E,6E,10x)-10,11-dihydroxy-2,6-farnesadienoate                                                                           | C21H36O9                                                     | Lipids                |            |
|                     | 8.4E-03              | 869.480                   | 5.5                   | [M+Cl] <sup>-</sup>     | 833.521                     | 20                       | PS (18:1(9Z)/22:6(4Z,7Z,10Z,13Z,16Z,19Z))                                                                                          | C46H76NO10P                                                  | Lipids                |            |
|                     | 6.0E-03              | 603.289                   | 1.6                   | [M+Cl] <sup>-</sup>     | 567.317                     | 8                        | PS (10:0/10:0)                                                                                                                     | C26H50NO10P                                                  | Lipids                |            |
|                     | 4.2E-03              | 449.190                   | 1.6                   | [M+K-2H] <sup>-</sup>   | 411.239                     | 10                       | PC (O-8:0/2:0)                                                                                                                     | C18H38NO7P                                                   | Lipids                |            |
|                     | 8.3E-03              | 431.196                   | 1.6                   | [M+Cl] <sup>-</sup>     | 397.223                     | 7                        | PE (12:0/0:0)                                                                                                                      | C17H36NO7P                                                   | Lipids                |            |
|                     | 1.4E-03              | 251.003                   | 4.4                   | [M+H] <sup>+</sup>      | 250.000                     | 18                       | Glycerate                                                                                                                          | C6H10CaO8                                                    | Photorespiration      |            |
|                     | 3.9E-03              | 315.108                   | 2.5                   | [M-H] <sup>-</sup>      | 316.116                     | 3                        | Hydroxytyrosol 1-O-glucoside                                                                                                       | C14H20O8                                                     | Polyphenol            |            |
|                     | 2.7E-04              | 249.112                   | 3.4                   | [M+H] <sup>+</sup>      | 248.105                     | 0                        | Prenyl caffeate                                                                                                                    | C14H16O4                                                     | Polyphenol            |            |
|                     | 1.2E-04              | 350.988                   | 4.4                   | [M+K] <sup>+</sup>      | 312.022                     | 7                        | Gamma-Glutamyl-Se-methylselenocysteine                                                                                             | C9H16N2O5Se                                                  | Redox                 |            |
|                     | 4.4E-03              | 267.087                   | 1.6                   | [M-H] <sup>-</sup>      | 268.088                     | 21                       | Cysteinyl-Phenylalanine                                                                                                            | C12H16N2O3S                                                  | Redox                 |            |
|                     | 6.9E-04              | 665.080                   | 3.3                   | [M+H] <sup>+</sup>      | 664.093                     | 30                       | Deamino-NAD <sup>+</sup>                                                                                                           | C21H26N6O15P2                                                | Redox                 |            |
|                     | 1.1E-03              | 493.077                   | 2.9                   | [M+Na] <sup>+</sup>     | 470.088                     | 0                        | Phe4Cl-Tyr-OH                                                                                                                      | C23H19CIN2O7                                                 | Amino acids           |            |
|                     | 6.6E-03              | 423.159                   | 1.6                   | [M+Na-2H] <sup>-</sup>  | 402.189                     | 10                       | D-Linalool 3-(6''-malonylglucoside)                                                                                                | C19H30O9                                                     | Terpenoids            |            |
|                     | 5.1E-04              | 467.166                   | 2.1                   | [M-H] <sup>-</sup>      | 468.178                     | 11                       | Dukunolide D                                                                                                                       | C26H28O8                                                     | Terpenoids            |            |
|                     | 4.2E-03              | 431.192                   | 1.6                   | [M-H] <sup>-</sup>      | 432.197                     | 5                        | S-Furanopetastin                                                                                                                   | C24H32O5S                                                    | Terpenoids            |            |
|                     | 1.1E-03              | 331.001                   | 4.4                   |                         |                             |                          |                                                                                                                                    |                                                              | Unknown               |            |
|                     | 7.3E-03              | 330.987                   | 4.4                   |                         |                             |                          |                                                                                                                                    |                                                              | Unknown               |            |
|                     | 1.1E-04              | 97.978                    | 4.4                   |                         |                             |                          |                                                                                                                                    |                                                              | Unknown               |            |
|                     | 8.1E-03              | 330.957                   | 4.4                   |                         |                             |                          |                                                                                                                                    |                                                              | Unknown               |            |
|                     | 3.0E-05              | 249.986                   | 4.4                   |                         |                             |                          |                                                                                                                                    |                                                              | Unknown               |            |
|                     | 1.7E-03              | 997.443                   | 2.9                   |                         |                             |                          |                                                                                                                                    |                                                              | Unknown               |            |
|                     | 7.4E-03              | 1001.458                  | 2.8                   |                         |                             |                          |                                                                                                                                    |                                                              | Unknown               |            |
|                     | 8.2E-03              | 731.210                   | 1.9                   |                         |                             |                          |                                                                                                                                    |                                                              | Unknown               |            |
|                     | 1.4E-03              | 1100.454                  | 3.0                   |                         |                             |                          |                                                                                                                                    |                                                              | Unknown               |            |
|                     | 8.1E-03              | 1187.442                  | 2.8                   |                         |                             |                          |                                                                                                                                    |                                                              | Unknown               |            |
|                     | 72 hours             | 5.5E-03                   | 634.415               | 6.2                     | [M+NH4] <sup>+</sup>        | 616.378                  | 5                                                                                                                                  | Tabernamine                                                  | C40H48N4O2            | Alkaloids  |
|                     |                      | 1.3E-03                   | 329.008               | 4.4                     | [M+2Na-H] <sup>+</sup>      | 284.032                  | 13                                                                                                                                 | 7,4',5'-Trihydroxy-5,2'-oxido-4-phenylcoumarin               | C15H8O6               | Coumarin   |
|                     |                      | 1.1E-03                   | 493.077               | 2.9                     | [M+2Na-H] <sup>+</sup>      | 448.101                  | 10                                                                                                                                 | 1,2,6,8-Tetrahydroxy-3-methylanthraquinone 2-O-b-D-glucoside | C21H20O11             | Flavonoids |
|                     |                      | 2.2E-04                   | 391.066               | 1.1                     | [M-H] <sup>-</sup>          | 392.074                  | 2                                                                                                                                  | 5,7,3',4',5'-Pentahydroxy-3,6,8-trimethoxyflavone            | C18H16O10             | Flavonoids |
|                     |                      | 5.3E-03                   | 427.124               | 1.5                     | [M+H-2O] <sup>+</sup>       | 444.121                  | 13                                                                                                                                 | Artomunoxanthentrione                                        | C26H20O7              | Flavonoids |
|                     |                      | 2.5E-03                   | 421.163               | 1.6                     | [M-H] <sup>-</sup>          | 422.173                  | 6                                                                                                                                  | Euchrenone b10                                               | C25H26O6              | Flavonoids |
|                     |                      | 8.1E-03                   | 348.991               | 4.4                     | [M+2Na-H] <sup>+</sup>      | 304.014                  | 16                                                                                                                                 | 6-Chloroapigenin                                             | C15H9ClO5             | Flavonoids |
| 8.2E-03             |                      | 730.203                   | 1.9                   | [M+NH4] <sup>+</sup>    | 712.185                     | 21                       | Syringetin 3-(6''-acetylglucosyl)(1->6)-galactoside                                                                                | C31H36O19                                                    | Flavonoids            |            |
| 1.0E-03             |                      | 244.027                   | 1.5                   | [M+H+Na]2 <sup>+</sup>  | 464.056                     | 1                        | 4-Hydroxyglucobrassicin                                                                                                            | C16H20N2O10S2                                                | Glucosinolate         |            |
| 1.4E-03             |                      | 664.066                   | 3.4                   | [M+Na] <sup>+</sup>     | 641.091                     | 20                       | 6-Sinapoylglucoraphenin                                                                                                            | C23H31NO14S3                                                 | Glucosinolate         |            |
| 1.4E-03             |                      | 251.003                   | 4.4                   | [M+H] <sup>+</sup>      | 250.000                     | 18                       | Glycerate                                                                                                                          | C6H10CaO8                                                    | Photorespiration      |            |
| 7.4E-03             |                      | 301.119                   | 1.7                   | [M+Na-2H] <sup>-</sup>  | 280.142                     | 5                        | Feruloyl-2-hydroxyputrescine                                                                                                       | C14H20N2O4                                                   | Polyamines            |            |
| 1.2E-04             |                      | 350.988                   | 4.4                   | [M+K] <sup>+</sup>      | 312.022                     | 7                        | Gamma-Glutamyl-Se-methylselenocysteine                                                                                             | C9H16N2O5Se                                                  | Redox                 |            |
| 6.9E-04             |                      | 664.071                   | 3.3                   | [M+H] <sup>+</sup>      | 663.109                     | 68                       | NAD <sup>+</sup>                                                                                                                   | C21H27N7O14P2                                                | Redox                 |            |
| 1.1E-03             |                      | 331.001                   | 4.4                   |                         |                             |                          |                                                                                                                                    |                                                              | Unknown               |            |
| 7.3E-03             |                      | 330.987                   | 4.4                   |                         |                             |                          |                                                                                                                                    |                                                              | Unknown               |            |
| 1.2E-03             |                      | 327.999                   | 4.4                   |                         |                             |                          |                                                                                                                                    |                                                              | Unknown               |            |
| 1.1E-04             |                      | 97.978                    | 4.4                   |                         |                             |                          |                                                                                                                                    |                                                              | Unknown               |            |
| 3.0E-05             | 249.986              | 4.4                       |                       |                         |                             |                          |                                                                                                                                    | Unknown                                                      |                       |            |
| 2.0E-04             | 992.945              | 8.7                       |                       |                         |                             |                          |                                                                                                                                    | Unknown                                                      |                       |            |
| 24 hours + Hpa      | 9.95E-03             | 165.080                   | 0.8                   | [M+H-2H2O] <sup>+</sup> | 200.095                     | 16                       | Harmalol                                                                                                                           | C12H12N2O                                                    | Alkaloids             |            |
|                     | 9.9E-03              | 882.307                   | 3.0                   | [M-H] <sup>-</sup>      | 883.290                     | 27                       | Wilfordine                                                                                                                         | C43H49NO19                                                   | Alkaloids             |            |
|                     | 4.0E-05              | 293.100                   | 1.3                   | [M-H] <sup>-</sup>      | 294.106                     | 3                        | N-Glycosyl-L-asparagine                                                                                                            | C10H18N2O8                                                   | Amino acids           |            |
|                     | 1.6E-03              | 416.105                   | 2.3                   | [M-H] <sup>-</sup>      | 417.117                     | 11                       | Asn-TyrMe-OH                                                                                                                       | C19H19N3O8                                                   | Amino acids           |            |
|                     | 5.3E-03              | 146.061                   | 1.0                   | [M+H-2H2O] <sup>+</sup> | 181.074                     | 1                        | L-Tyrosine                                                                                                                         | C9H11NO3                                                     | Amino acids           |            |
|                     | 3.6E-03              | 778.169                   | 2.3                   | [M+Na-2H] <sup>-</sup>  | 757.219                     | 32                       | Pelargonidin 3-sophoroside 5-glucoside                                                                                             | C33H41O20                                                    | Flavonoids            |            |

|                       |          |          |     |                         |          |    |                                                                      |             |                |
|-----------------------|----------|----------|-----|-------------------------|----------|----|----------------------------------------------------------------------|-------------|----------------|
|                       | 1.0E-05  | 189.074  | 1.8 | [M-H <sub>2</sub> O-H]- | 208.089  | 17 | Chalcone                                                             | C15H12O     | Flavonoids     |
|                       | 1.1E-03  | 417.107  | 2.3 | [M-H]-                  | 418.126  | 29 | 4'-Hydroxy-3,5,6,7,3',5'-hexamethoxyflavone                          | C21H22O9    | Flavonoids     |
|                       | 8.0E-03  | 557.298  | 2.9 | [M-H]-                  | 558.298  | 12 | Denticulaflavonol                                                    | C35H42O6    | Flavonoids     |
|                       | 1.7E-03  | 454.203  | 3.0 | [M-H]-                  | 455.212  | 2  | 5-Ribosylparomamine                                                  | C17H33N3O11 | Glucosides     |
|                       | 6.4E-04  | 402.089  | 1.7 | [M-H]-                  | 403.097  | 1  | 3-Methylpentyl glucosinolate                                         | C13H25NO9S2 | Glucosinolates |
|                       | 5.4E-03  | 448.069  | 1.7 | [M+2Na-H]+              | 403.097  | 0  | 3-Methylpentyl glucosinolate                                         | C13H25NO9S2 | Glucosinolates |
|                       | 2.7E-04  | 249.112  | 3.4 | [M+Na-2H]-              | 228.136  | 5  | (-)-11-hydroxy-9,10-dihydrojasmonic acid                             | C12H20O4    | Phytohormones  |
|                       | 1.12E-03 | 119.074  | 0.8 | [M+H-H <sub>2</sub> O]+ | 136.0749 | 15 | Tetrahydropteridine                                                  | C6H8N4      | Redox          |
|                       | 3.6E-03  | 221.983  | 0.4 | [M-H <sub>2</sub> O-H]- | 241.008  | 29 | 3-Mercaptolactate-cysteine disulfide                                 | C6H11NO5S2  | Thiols         |
|                       | 2.6E-04  | 1044.112 | 5.4 |                         |          |    |                                                                      |             | Unknown        |
|                       | 7.4E-03  | 301.119  | 1.7 | [M-H]-                  | 302.115  | 36 | 2,4'-Dihydroxy-4,6-dimethoxydihydrochalcone                          | C17H18O5    | Flavonoids     |
|                       | 8.3E-03  | 543.245  | 4.3 | [M+Na-2H]-              | 522.268  | 4  | 7,8-Dihydro-3b,6a-dihydroxy-alpha-ionol 9-[apiosyl-(1->6)-glucoside] | C24H42O12   | Flavonoids     |
| <b>72 hours + Hpa</b> | 5.4E-03  | 448.069  | 1.7 | [M+2Na-H]+              | 403.097  | 1  | 3-Methylpentyl glucosinolate                                         | C13H25NO9S2 | Glucosides     |
|                       | 5.7E-03  | 525.353  | 5.8 | [M+H]+                  | 524.348  | 3  | PG (P-20:0/0:0)                                                      | C26H53O8P   | Lipids         |
|                       | 1.5E-03  | 547.590  | 6.2 |                         |          |    |                                                                      |             | Unknown        |
|                       | 1.8E-03  | 518.763  | 5.6 |                         |          |    |                                                                      |             | Unknown        |

<sup>a</sup> conditions for which the metabolic markers showed a statistically significant accumulation between saCO<sub>2</sub> and aCO<sub>2</sub>

<sup>b</sup> P values indicate levels of significance from FDR adjusted ANOVA and subsequent two-factor ANOVA (P < 0.01)

<sup>c</sup> accurate m/z values with their corresponding retention time (RT) detected by UPLC-qTOF-MS

<sup>d</sup> predicted parameters from the METLIN database using the detected accurate m/z

<sup>e</sup> putative metabolites and their corresponding pathways were validated by information from the PubMed chemical database

\* putative metabolites that are oxidised

Adducts : type of ion generated by electrospray ionization; Δppm: difference between observed and theoretical monoisotopic masses; PC: Phosphatidylcholine; PE: Phosphatidylethanolamine; PG: Phosphoglycerol; PS: Phosphatidylserine.

## **Methods S1: supplemental Materials and Methods**

**Chemicals and reagents.** All chemicals and solvents (higher analytical MS grade) used in this study were purchased from Sigma-Aldrich (UK), except JA which was obtained from OlChemim (<http://www.olchemim.cz/>).

**Targeted quantification of hormones.** SA and JA were quantified by UPLC-Q-TOF-MS<sup>E</sup>, using a previous method (Pétriacq *et al.*, 2016). Briefly, phytohormones were double- extracted from frozen leaf material (10 mg dry weight) in a total volume of 1.5 mL of ethyl acetate. Each biologically replicated sample consisted of 4 pooled leaves of similar size and age from different plants. Hormones were quantified by UPLC-Q-TOF-MS<sup>E</sup> in negative electrospray ionization mode (ESI<sup>-</sup>), using standard curves of pure SA and JA. Compound identity was verified by the following fragmentation patterns: SA, 137→93; and JA, 209→59.

**Untargeted metabolic profiling by UPLC-qTOF-MS<sup>E</sup>.** Plant metabolic profiles at *saCO*<sub>2</sub> or *aCO*<sub>2</sub> were analysed after application of DC. Plants in the 8-leaf stage were inoculated with *Hpa* or water (mock), after which leaf tissue of 4 plants from each pot were pooled as one biological replicate. Replicates (n = 3) were collected in the middle of the photoperiod and snap frozen in liquid nitrogen at 24 hpi and 72 hpi. UPLC-Q-TOF-MS<sup>E</sup> analysis of methanol extracts was carried out as described previously (Pétriacq *et al.*, 2016), using the following modifications: high-resolution full-scan mass spectrometry was performed with a SYNAPT G2 HDMS Q-TOF mass spectrometer (Waters), coupled to a UPLC BEH C18 column (2.1 × 50 mm, 1.7 μm, Waters) with a guard column (VanGuard, 2.1 x 5 mm, 1.7 μm, Waters) for separation of compounds at a flow rate of 400 μL min<sup>-1</sup>. The mobile phase consisted of A; water with 0.05% formic acid, and B; acetonitrile with 0.05% formic acid with a gradient applied: 0 – 3 min 5 – 35 % B, 3 – 6 min 35 – 100 % B, holding at 100 % B for 2 min, 8 – 10 min, 100 – 5 % B. The column temperature was kept at 45 °C with an injection volume of 10 μL. Buffer (50% methanol) was injected between treatments and between ESI<sup>-</sup> and ESI<sup>+</sup> ionization modes for stabilization of the electrospray ionization source.

Ions were detected over a mass range of 50 – 1200 Da, using a scan time of 0.2 s (ESI<sup>-</sup> and ESI<sup>+</sup>) with the instrument operating in sensitivity mode for the MS full scan (*i.e.* without collision energy). Collision energy was ramped in the transfer cell from 5 to 45 eV (MS<sup>E</sup>), using the following conditions:

|                             | ESI <sup>-</sup> | ESI <sup>+</sup> |
|-----------------------------|------------------|------------------|
| Capillary voltage (kV)      | - 3              | + 3              |
| Sampling cone voltage (V)   | - 25             | + 25             |
| Extraction cone voltage (V) | - 4.5            | + 10             |

|                                           |     |     |
|-------------------------------------------|-----|-----|
| Source Temperature (°C)                   | 120 | 120 |
| Desolvation Temperature (°C)              | 350 | 350 |
| Desolvation gas flow (L h <sup>-1</sup> ) | 800 | 800 |
| Cone gas flow (L h <sup>-1</sup> )        | 60  | 60  |

---

Prior to analysis, the Q-TOF detector was calibrated with a solution of sodium formate. During each run, accurate mass measurements were ensured by infusing leucine enkephalin peptide as an internal reference (10 s scan frequency, cone voltage of 40 V and a capillary voltage of 3 kV). The system was controlled by MassLynx v 4.1 software (Waters).

**Statistical analysis of metabolic profiling data.** Raw files obtained from MassLynx were converted into CDF format, using the Databridge function in MassLynx (v. 4.1). Subsequent alignment and integration of metabolic peaks were performed in R (v 3.1.3), using XCMS (Smith *et al.*, 2006). Peaks were retained for analysis when present in all bioreplicates ( $k = 3$ ), at a threshold intensity of 10 ( $I = 10$ ) and at maximum resolution range of 20 ppm. Peak values from each run were normalised for total ion current (TIC). For each sample, normalised peak values were corrected for dry weight, generating a dataset of 5683  $m/z$  values in ESI<sup>+</sup> and 4479  $m/z$  values in ESI<sup>-</sup>.

Global differences in metabolic signals between treatment/point combinations was visualised for anions (ESI<sup>-</sup>) and cations (ESI<sup>+</sup>) separately by principal component analysis (PCA, Fig. S5), using MetaboAnalyst online (v. 3.0; <http://www.metaboanalyst.ca>; Xia *et al.*, 2015) on median-normalised, cube-root-transformed and Pareto-scaled data. To select ions that are induced by *saCO*<sub>2</sub> directly or primed by *saCO*<sub>2</sub> for augmented induction following *Hpa* inoculation, ESI<sup>-</sup> and ESI<sup>+</sup> datasets were analysed separately for statistically significant differences between all CO<sub>2</sub>/treatment/time-point combinations by one-way ANOVA ( $P < 0.01$  + Benjamini-Hochberg false discovery rate correction, FDR; see Fig. S6), using MarVis (v. 1.0; <http://marvis.gobics.de>; Kaever *et al.*, 2012). From each ionization mode, 133 statistically significant markers were combined into one dataset of 266 markers for successive 2-way ANOVA ( $P < 0.01$ ), using MeV (v. 4.9.0; <http://mev.tm4.org>). Heatmaps project TIC-normalised ion current (NIC) values, relative to the average and standard deviation of all NIC values across all samples: Value = (NIC – mean) / SD. For each time-point (24 and 72 hpi), this analysis resulted in 3 subsets of markers, whose intensity was influenced by CO<sub>2</sub>, *Hpa*, or the CO<sub>2</sub> x *Hpa* interaction (Fig. S6b). Hierarchical clustering (Pearson's correlation; MeV) allowed visual selection of ion clusters that are induced directly by *saCO*<sub>2</sub> or primed for augmented induction after *Hpa* inoculation, as detailed in Fig. S6c. Putative identities of the selected ion markers were based on  $m/z$  values at stringent accuracy (< 30 ppm), the using METLIN chemical database (Smith *et al.*, 2005).



## ***References***

- Kaever A, Landesfeind M, Possienke M, Feussner K, Feussner I, Meinicke P. 2012.** MarVis-Filter: ranking, filtering, adduct and isotope correction of mass spectrometry data. *Journal of biomedicine & biotechnology* **2012**: 263910.
- Pétriacq P, Ton J, Patrit O, Tcherkez G, Gakière B. 2016.** NAD acts as an integral regulator of multiple defense layers. *Plant Physiology* **172**: 1465–1479.
- Smith CA, O'Maille G, Want EJ, Qin C, Trauger SA, Brandon TR, Custodio DE, Abagyan R, Siuzdak G. 2005.** METLIN: a metabolite mass spectral database. *Therapeutic Drug Monitoring* **27**: 747–751.
- Smith CA, Want EJ, O'Maille G, Abagyan R, Siuzdak G. 2006.** XCMS: processing mass spectrometry data for metabolite profiling using nonlinear peak alignment, matching, and identification. *Analytical Chemistry* **78**: 779–787.
- Xia J, Sinelnikov I V., Han B, Wishart DS. 2015.** MetaboAnalyst 3.0—making metabolomics more meaningful. *Nucleic Acids Research* **43**: W251–W257.
